# Supplementary material for: Acoustic Anomalies and the Critical Slowing-Down Behavior of MAPbCl3 Single Crystals Studied by Brillouin Light Scattering
Source: MDPI journal article supplement (doi:10.3390/ma15103692), 2022-05-21

## **Supplementary Materials**

# **Acoustic Anomalies and the Critical Slowing-Down Behavior of MAPbCl<sub>3</sub> Single Crystals Studied by Brillouin Light Scattering**

Jeong Woo Lee, Furqanul Hassan Naqvi, Jae-Hyeon Ko\*

School of Nano Convergence Technology, Nano Convergence Technology Center, Hallym University, Chuncheon, Gangwondo 24252, Republic of Korea

Tae Heon Kim and Chang Won Ahn

Department of Physics and Energy Harvest-Storage Research Center (EHSRC), University of Ulsan, Ulsan, 44610, Republic of Korea

\* Correspondence: email: hwangko@hallym.ac.kr

Figure S1. comparison of (a) the Brillouin frequency shift and (b) the FWHM with the real part of the dielectric permittivity reported in Ref. 31.

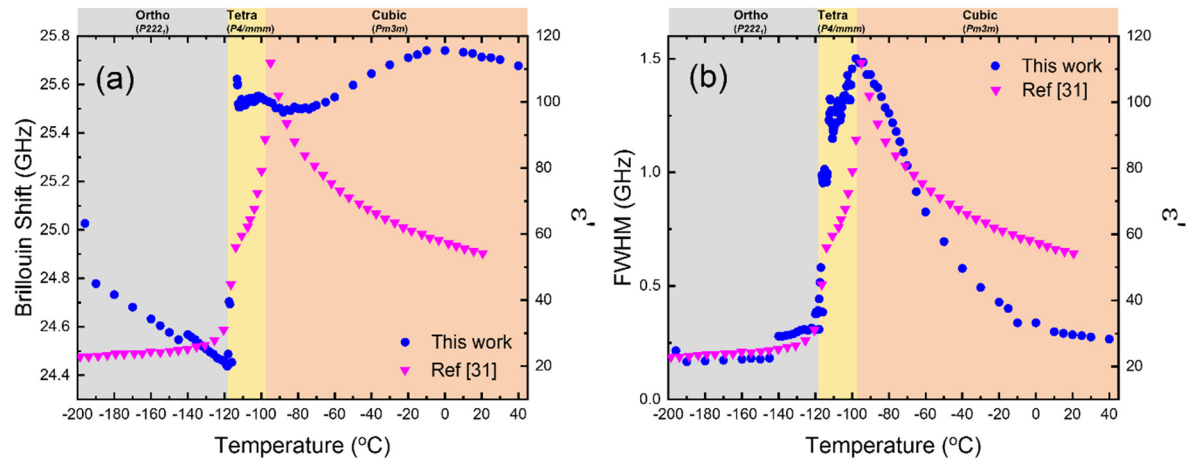

Figure S2. Temperature dependences of (a) the mode frequency and (b) the FWHM of the TA mode propagating along the [100] direction measured upon cooling and heating.

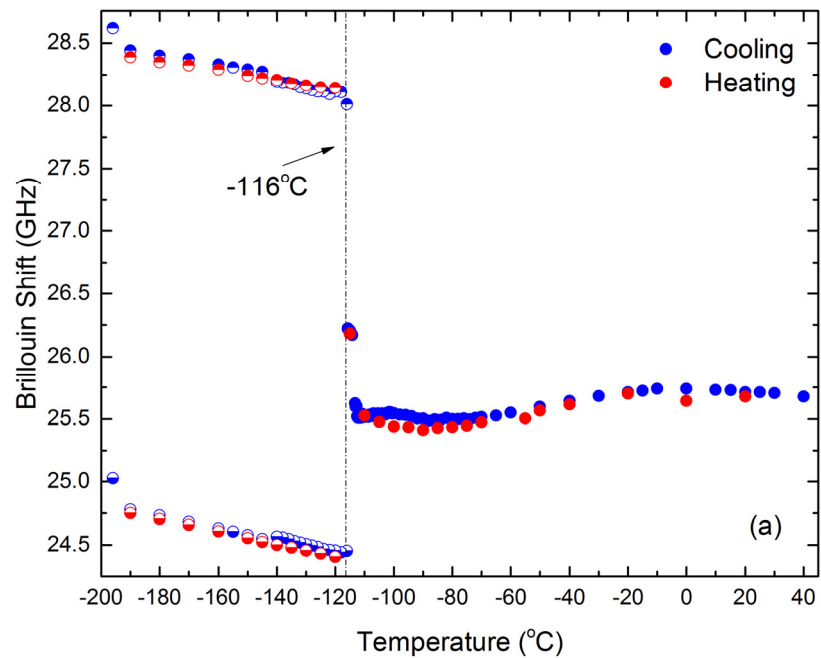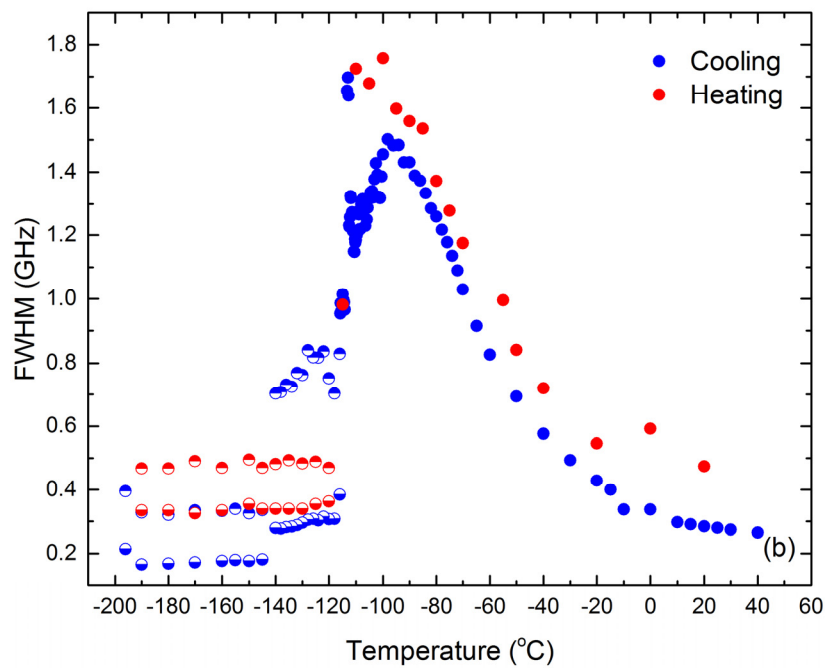

Figure S3. Temperature dependences of (a) the mode frequency and (b) the FWHM of the TA mode propagating along the [100] direction measured upon cooling and heating.

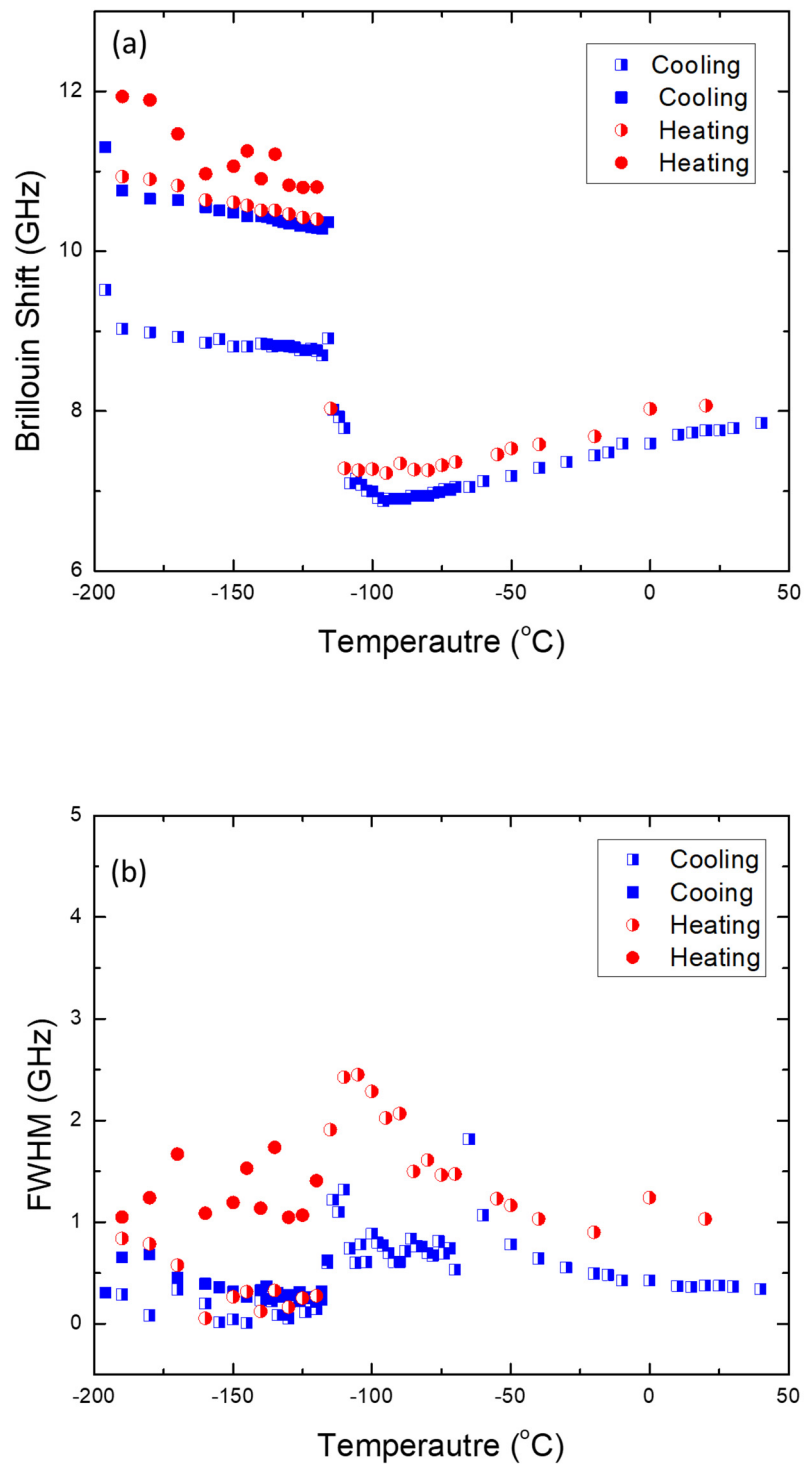

Supplement: s1 [file s1]
